# Supplementary material
Source: PubMed Central journal article supplement (PMC4848143)
Supplement: NIHMS763619-supplement-2.pdf [file NIHMS763619-supplement-2.pdf]

## Supplementary information

**Supplementary table 1: GATC sites partially or fully non-methylated during log-to-stationary phase transition in LB or over the course of ampicillin treatment.**

|                               | Site                  | Position | Coverage <sup>b</sup>    | Genetic arrangement  |               |                 | Ref.     |                                  |       |
|-------------------------------|-----------------------|----------|--------------------------|----------------------|---------------|-----------------|----------|----------------------------------|-------|
|                               |                       |          |                          | Inter-/intra-genic   | Upstream gene | Downstream gene |          | Overlapping protein binding site |       |
| Methylation pattern over time | Methylation increases | 1        | 1031046(+)<br>1031047(-) | 104 ± 24<br>106 ± 24 | intergenic    | serT (-)        | hyaA (+) | -                                | -     |
|                               |                       | 2        | 1218081(+)<br>1218082(-) | 103 ± 24<br>99 ± 22  | intergenic    | ycgG (+)        | ymgF (+) | -                                | -     |
|                               |                       | 3        | 1528561(+)<br>1528562(-) | 97 ± 21<br>99 ± 21   | intergenic    | ydcD (+)        | yncI (+) | -                                | -     |
|                               |                       | 4        | 3740678(+)<br>3740679(-) | 158 ± 35<br>157 ± 35 | intergenic    | yiaJ (-)        | yiaK(+)  | R- Pol*                          | -     |
|                               |                       | 5        | 3873329(+)<br>3873330(-) | 155 ± 35<br>155 ± 34 | intergenic    | dgoR (+)        | yidX (+) | -                                | -     |
|                               | Methylation decreases | 6        | 1099423(+)<br>1099424(-) | 100 ± 20<br>101 ± 18 | intergenic    | ycdY (+)        | ycdZ (+) | CRP                              | 1     |
|                               |                       | 7        | 1168222(+)<br>1168223(-) | 103 ± 21<br>105 ± 23 | intergenic    | comR (-)        | bhsA (+) | CRP                              | -     |
|                               |                       | 8        | 2229801(+)<br>2229802(-) | 106 ± 18<br>108 ± 15 | intergenic    | yohK (+)        | cdd (+)  | CRP                              | 1,3   |
|                               |                       | 9        | 3490456(+)<br>3490457(-) | 154 ± 32<br>150 ± 31 | intergenic    | ppiA (-)        | tgsA (+) | CRP                              | -     |
|                               |                       | 10       | 3769994(+)<br>3769995(-) | 158 ± 34<br>158 ± 34 | intergenic    | yibL (-)        | mltA (+) | CRP                              | -     |
|                               | Non-methylated        | 11       | 1168246(+)<br>1168247(-) | 105 ± 23<br>106 ± 23 | intergenic    | comR (-)        | bhsA (+) | ComR*                            | 1     |
|                               |                       | 12       | 1653239(+)<br>1653240(-) | 95 ± 20<br>95 ± 20   | intergenic    | rpsA (+)        | ynfA (+) | Yhdf*                            | 1,2,4 |
|                               |                       | 13       | 2823768(+)<br>2823769(-) | 119 ± 21<br>121 ± 24 | intergenic    | mltB (+)        | gutA (+) | CRP; GutR*                       | 1,2,4 |
|                               |                       | 14       | 4099564(+)<br>4099565(-) | 150 ± 35<br>150 ± 35 | intergenic    | sodA (+)        | kdgT (+) | -                                | -     |
|                               | Hemimethylated        | 15       | 3371659(+)<br>3371660(-) | 142 ± 29<br>142 ± 27 | intergenic    | -- (+)          | -nR (+)  | Fis                              | -     |
|                               |                       | 16       | 4501643(+)<br>4501644(-) | 145 ± 32<br>144 ± 32 | intergenic    | insG (+)        | yjhB (+) | -nR*                             | -     |
|                               |                       | 17       | 4537968(+)<br>4537969(-) | 152 ± 26<br>150 ± 25 | intergenic    | -nC (-)         | fimB (+) | -nR*                             | -     |
|                               | Other                 | 18       | 621451(+)<br>621452(-)   | 113 ± 21<br>115 ± 23 | intergenic    | fepD (-)        | entS (+) | Fur                              | -     |
|                               |                       | 19       | 1840399(+)<br>1840400(-) | 100 ± 22<br>100 ± 21 | intragenic    | gdhA (+)        | gdhA(+)  | -                                | -     |

<sup>a</sup>Base pairs and strand; <sup>b</sup>average sequencing coverage ± SD, n = 2–3 replicates; \*protein binding sites is within 10 bp of methylation site. Sites are grouped based on methylation pattern over time in untreated *E. coli*.

**Supplementary table 2: Statistical analysis of differential methylation in LB versus ampicillin treatment at selected GATC sites from Fig. 2d.**

| Site | Position <sup>a</sup> | P-values (undjusted) <sup>b</sup> |       |       |       | P-values (multiplicity adjusted) <sup>c</sup> |       |       |       |
|------|-----------------------|-----------------------------------|-------|-------|-------|-----------------------------------------------|-------|-------|-------|
|      |                       | 1h                                | 2h    | 3h    | 4h    | 1h                                            | 2h    | 3h    | 4h    |
| 1    | 1031046(+)            | 0.491                             | 0.937 | 0.011 | 0.219 | 0.833                                         | 1.000 | 0.887 | 0.886 |
|      | 1031047(-)            | 0.174                             | 0.883 | 0.273 | 0.281 | 0.833                                         | 1.000 | 0.887 | 0.886 |
| 2    | 1218081(+)            | 0.008                             | 0.708 | 0.455 | 0.455 | 0.833                                         | 0.952 | 0.887 | 0.886 |
|      | 1218082(-)            | 0.621                             | 0.894 | 0.492 | 0.546 | 0.859                                         | 1.000 | 0.887 | 0.887 |
| 3    | 1528561(+)            | 0.570                             | 0.327 | 0.364 | 0.492 | 0.843                                         | 0.937 | 0.887 | 0.886 |
|      | 1528562(-)            | 0.478                             | 0.931 | 0.636 | 0.328 | 0.833                                         | 1.000 | 0.890 | 0.886 |
| 4    | 3740678(+)            | 0.980                             | 0.345 | 0.342 | 0.193 | 1.000                                         | 0.937 | 0.887 | 0.886 |
|      | 3740679(-)            | -                                 | 0.423 | 0.398 | 0.001 | 1.000                                         | 0.937 | 0.887 | 0.886 |
| 5    | 3873329(+)            | -                                 | 0.630 | 0.759 | 0.166 | 1.000                                         | 0.938 | 0.932 | 0.886 |
|      | 3873330(-)            | 0.423                             | 0.184 | 0.499 | 0.064 | 0.833                                         | 0.937 | 0.887 | 0.886 |
| 6    | 1099423(+)            | 0.386                             | 0.832 | 0.423 | 0.112 | 0.833                                         | 0.987 | 0.887 | 0.886 |
|      | 1099424(-)            | 0.999                             | -     | -     | 0.500 | 1.000                                         | 1.000 | 1.000 | 0.886 |
| 7    | 1168222(+)            | 0.939                             | 0.423 | -     | 0.848 | 1.000                                         | 0.937 | 1.000 | 0.980 |
|      | 1168223(-)            | 0.594                             | 0.990 | 0.185 | 0.971 | 0.850                                         | 1.000 | 0.887 | 1.000 |
| 8    | 2229801(+)            | 0.243                             | 0.500 | 0.423 | 0.209 | 0.833                                         | 0.937 | 0.887 | 0.886 |
|      | 2229802(-)            | 0.412                             | 0.593 | 0.846 | 0.346 | 0.833                                         | 0.937 | 0.961 | 0.886 |
| 9    | 3490456(+)            | 0.074                             | 0.645 | 0.389 | 0.755 | 0.833                                         | 0.939 | 0.887 | 0.948 |
|      | 3490457(-)            | 0.387                             | 0.694 | 0.837 | 0.003 | 0.833                                         | 0.949 | 0.957 | 0.886 |
| 10   | 3769994(+)            | 0.423                             | -     | -     | -     | 0.833                                         | 1.000 | 1.000 | 1.000 |
|      | 3769995(-)            | 0.542                             | 0.500 | 0.423 | -     | 0.835                                         | 0.937 | 0.887 | 1.000 |
| 11   | 1168246(+)            | -                                 | 0.500 | 0.423 | 0.423 | 1.000                                         | 0.937 | 0.887 | 0.886 |
|      | 1168247(-)            | 0.423                             | 0.864 | 0.186 | 0.127 | 0.833                                         | 0.997 | 0.887 | 0.886 |
| 12   | 1653239(+)            | 0.541                             | -     | -     | 0.500 | 0.835                                         | 1.000 | 1.000 | 0.886 |
|      | 1653240(-)            | -                                 | -     | -     | -     | 1.000                                         | 1.000 | 1.000 | 1.000 |
| 13   | 2823768(+)            | 0.886                             | 0.423 | -     | -     | 0.977                                         | 0.937 | 1.000 | 1.000 |
|      | 2823769(-)            | 0.554                             | -     | -     | -     | 0.838                                         | 1.000 | 1.000 | 1.000 |
| 14   | 4099564(+)            | -                                 | -     | -     | 0.500 | 1.000                                         | 1.000 | 1.000 | 0.886 |
|      | 4099565(-)            | -                                 | -     | -     | 0.500 | 1.000                                         | 1.000 | 1.000 | 0.886 |
| 15   | 3371659(+)            | 0.838                             | 0.860 | 0.423 | 0.423 | 0.955                                         | 0.995 | 0.887 | 0.886 |
|      | 3371660(-)            | 0.423                             | 0.423 | 0.500 | 0.603 | 0.833                                         | 0.937 | 0.887 | 0.894 |
| 16   | 4501643(+)            | 0.199                             | 0.849 | 0.127 | 0.638 | 0.833                                         | 0.993 | 0.887 | 0.903 |
|      | 4501644(-)            | -                                 | -     | -     | -     | 1.000                                         | 1.000 | 1.000 | 1.000 |
| 17   | 4537968(+)            | 0.441                             | 0.423 | -     | 0.423 | 0.833                                         | 0.937 | 1.000 | 0.886 |
|      | 4537969(-)            | 0.423                             | 0.901 | 0.507 | 0.508 | 0.833                                         | 1.000 | 0.887 | 0.886 |
| 18   | 621451(+)             | 0.671                             | 0.136 | 0.191 | 0.005 | 0.879                                         | 0.937 | 0.887 | 0.886 |
|      | 621452(-)             | 0.803                             | 0.185 | 0.013 | 0.001 | 0.939                                         | 0.937 | 0.887 | 0.886 |
| 19   | 1840399(+)            | 0.873                             | 0.319 | 0.033 | 0.106 | 0.971                                         | 0.937 | 0.887 | 0.886 |
|      | 1840400(-)            | 0.489                             | 0.532 | 0.000 | 0.311 | 0.833                                         | 0.937 | 0.004 | 0.886 |

<sup>a</sup>Base pairs and strand; <sup>b</sup>p-value determined using a two-tailed heteroskedastic (unequal variances) t-test; <sup>c</sup>p-value adjusted for multiple hypothesis testing on the whole dataset using Benjamini-Hochberg false discovery rate correction; for sites with no change in frac between LB and ampicillin treatment the t-test cannot be performed and the adjusted p-value is 1 (non-significant); cells in red, p<0.05.

**Supplementary table 3: Quinolone-resistance conferring mutations in Cipro<sup>R</sup> UPEC clinical isolate**

| Gene        | Function                             | Mutation | Ref. |
|-------------|--------------------------------------|----------|------|
| <i>gyrA</i> | D- gyrase subunit A                  | S83L     | 5    |
|             |                                      | D87N     |      |
| <i>parC</i> | D- topoisomerase IV, subunit A       | S80I     | 6    |
| <i>parE</i> | D- topoisomerase IV, subunit B       | S458A    |      |
| <i>marR</i> | Activator of multidrug efflux system | G103S    |      |
|             |                                      | Y137H    |      |

**Supplementary references**

1. Tavazoie, S. & Church, G.M. Quantitative whole-genome analysis of Dam protein interactions by in vivo methylase protection in *E. coli*. *Nat Biotechnol* **16**, 566-71 (1998).
2. Wang, M.X. & Church, G.M. A whole genome approach to in vivo Dam protein interactions in *E. coli*. *Nature* **360**, 606-10 (1992).
3. Holst, B., Sogaard-Andersen, L., Pedersen, H. & Valentin-Hansen, P. The cAMP-CRP/CytR nucleoprotein complex in *Escherichia coli*: two pairs of closely linked binding sites for the cAMP-CRP activator complex are involved in combinatorial regulation of the *cdd* promoter. *EMBO J* **11**, 3635-43 (1992).
4. Hale, W.B., van der Woude, M.W. & Low, D.A. Analysis of nonmethylated GATC sites in the *Escherichia coli* chromosome and identification of sites that are differentially methylated in response to environmental stimuli. *J Bacteriol* **176**, 3438-41 (1994).
5. Mavroidi, A. *et al.* Ciprofloxacin-resistant *Escherichia coli* in Central Greece: mechanisms of resistance and molecular identification. *BMC Infect Dis* **12**, 371 (2012).
6. Zayed, A.A., Essam, T.M., Hashem, A.G. & El-Tayeb, O.M. 'Supermutators' found amongst highly levofloxacin-resistant *E. coli* isolates: a rapid protocol for the detection of mutation sites. *Emerg. Microbes Infect. Dis.* **4**(2015).
